# Supplementary material for: Boron-/nitrogen-doped Ti 3 C 2 T x MXene quantum dot-based sensor for determining an acute kidney injury biomarker
Source: Royal Society of Chemistry journal article supplement (doi:10.1039/d5ra04474j), 2025-01-01
Supplement: d5ra04474j1.pdf [file d5ra04474j1.pdf]

## Supplementary information

### **Boron/Nitrogen-doped $\text{Ti}_3\text{C}_2\text{T}_x$ MXene quantum dots-based sensor for determining acute kidney injury biomarker**

Rijo Rajeev, Ann Mariella Babu, Anitha Varghese\*

<sup>1</sup>*Department of Chemistry, Christ University, Bangalore, Karnataka, India- 560029*

<sup>2</sup>*Centre for Renewable energy and Environmental Sustainability, Christ University, Karnataka, India-560 029*

\*Corresponding Author Email: [anitha.varghese@christuniversity.in](mailto:anitha.varghese@christuniversity.in)

## SI. Results and discussion

### SI 1. XPS analysis

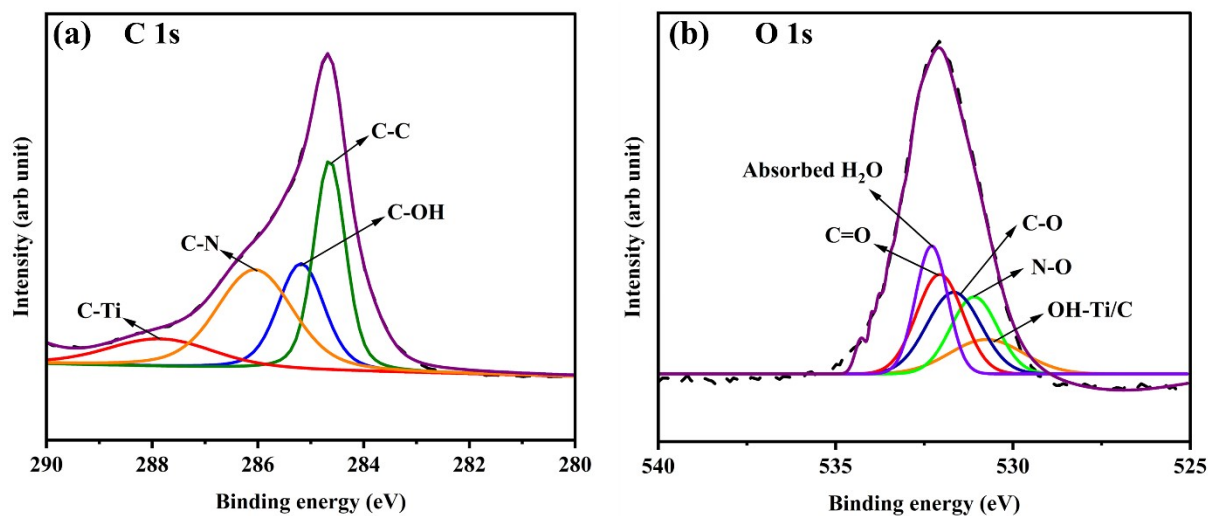

**Figure S1** XPS analysis of BNMQD/CFP electrode after oxidation of Crt. The obtained XPS spectrum has been shown with a dotted line.

### SI 2. Buffer pH effect on Crt detection

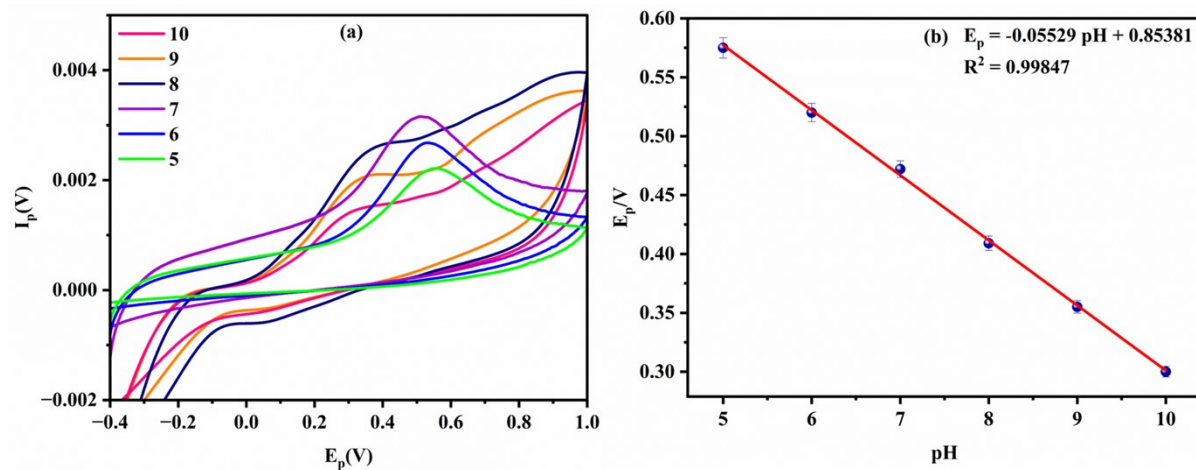

**Figure S2** (a) CVs of BNMQD/CFP electrode containing 100  $\mu$ M Crt in 0.1 PBS at various pH (b) Plot of pH vs. anodic peak potential of 100  $\mu$ M Crt.

### SI 3. Reproducibility, repeatability, and stability studies of BNMQD/CFP

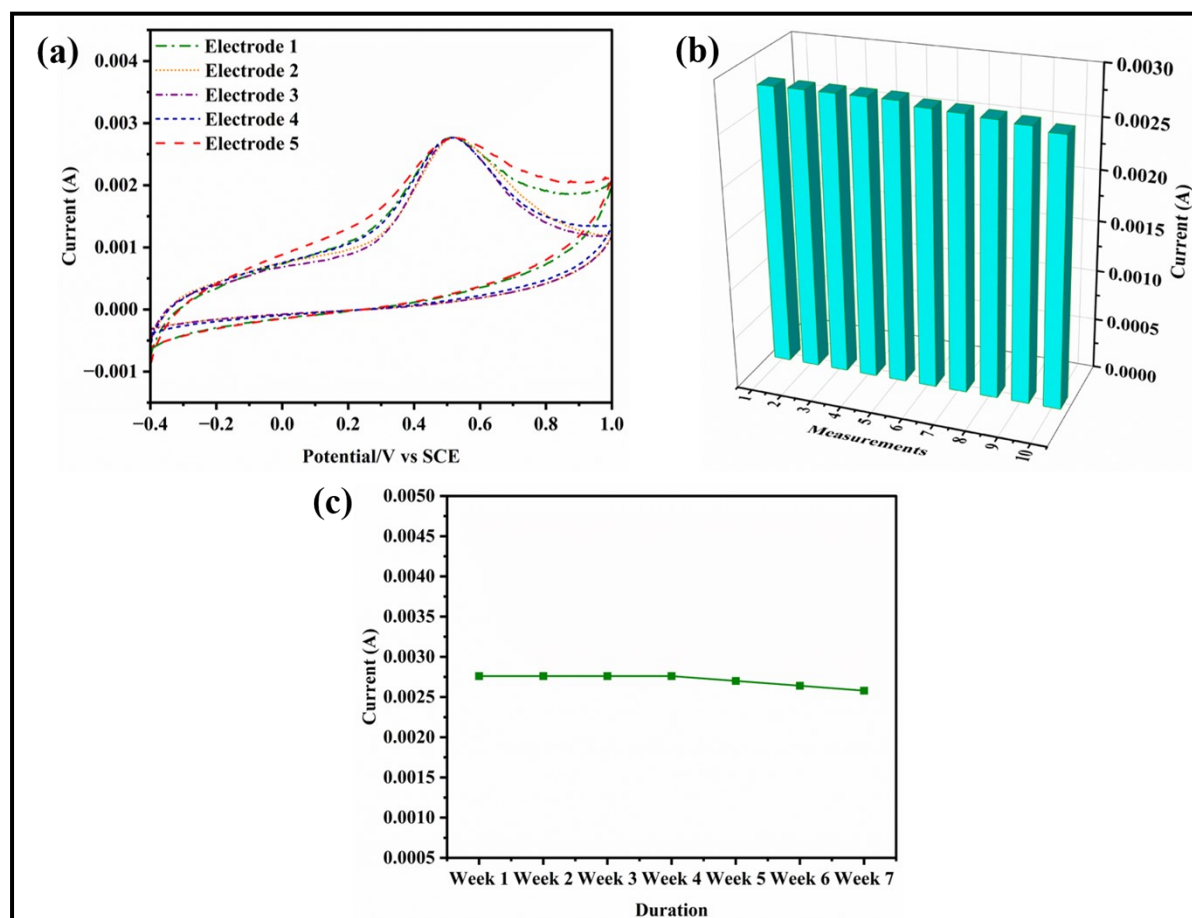

**Figure S3** (a) Reproducibility of five BNMQD/CFP electrodes in the presence of Crt. (b) Repeatability of BNMQD/CFP electrodes for a series of 10 repetitive CV studies in the presence of Crt. (c) Long-term stability of BNMQD/CFP for electrooxidation of Crt for 7 weeks.
